# Supplementary material for: Toward low-sensitive and high-energetic cocrystal I: evaluation of the power and the safety of observed energetic cocrystals
Source: Royal Society of Chemistry journal article supplement (doi:10.1039/c3ce40112j), 2013-01-01
Supplement: c3ce40112j.pdf [file c3ce40112j.pdf]

## Toward Low-sensitive and High-energetic Cocystal I: Evaluation of the Power and the Safety of Observed Energetic Cocystals

### Supporting information

The  $V_D$  and  $P_D$  calculation details using K-J equation.

|                   |                                                   | Products, in mol        |           |                        |                       |          |                       |                       |           |            |                        |                                      |          | M<br>g/mol | N<br>mol | $\bar{M}$<br>g/mol | HOF(s)<br>kcal/mol | $Q_D$<br>kcal/mol | $d_{298K}$<br>g/cm <sup>3</sup> | $V_D$<br>km/s | $P_D$<br>GPa |
|-------------------|---------------------------------------------------|-------------------------|-----------|------------------------|-----------------------|----------|-----------------------|-----------------------|-----------|------------|------------------------|--------------------------------------|----------|------------|----------|--------------------|--------------------|-------------------|---------------------------------|---------------|--------------|
|                   |                                                   | H <sub>2</sub> O<br>(g) | CO<br>(g) | CO <sub>2</sub><br>(g) | N <sub>2</sub><br>(g) | C<br>(s) | H <sub>2</sub><br>(g) | O <sub>2</sub><br>(g) | HF<br>(g) | HBr<br>(g) | SO <sub>2</sub><br>(g) | P <sub>2</sub> O <sub>5</sub><br>(s) | S<br>(g) |            |          |                    |                    |                   |                                 |               |              |
| $\epsilon$ -CL-20 | 4 $\epsilon$ -CL-20                               | 3                       | 3         | 3                      | 6                     | 0        | 0                     | 0                     | 0         | 0          | 0                      | 0                                    | 0        | 438        | 0.034247 | 29.20              | 32.4               | 1294.95           | 2.044                           | 9.5           | 43.3         |
| $\beta$ -CL-20    | 4 $\beta$ -CL-20                                  | 3                       | 3         | 3                      | 6                     | 0        | 0                     | 0                     | 0         | 0          | 0                      | 0                                    | 0        | 438        | 0.034247 | 29.20              | 35.5               | 1301.89           | 1.985                           | 9.3           | 41.0         |
| $\gamma$ -CL-20   | 4 $\gamma$ -CL-20                                 | 3                       | 3         | 3                      | 6                     | 0        | 0                     | 0                     | 0         | 0          | 0                      | 0                                    | 0        | 438        | 0.034247 | 29.20              | 37.2               | 1305.87           | 1.916                           | 9.1           | 38.2         |
| 1                 | <b>8<math>\alpha</math>-CL-20/8H<sub>2</sub>O</b> | 4                       | 3         | 3                      | 6                     | 0        | 0                     | 0                     | 0         | 0          | 0                      | 0                                    | 0        | 456        | 0.035088 | 28.50              | -35.1              | 1222.57           | 1.981                           | 9.2           | 40.0         |
| 2                 | 2 $\gamma$ -CL-20/4DMF                            | 10                      | 4         | 0                      | 7                     | 8        | 0                     | 0                     | 0         | 0          | 0                      | 0                                    | 0        | 584        | 0.035959 | 23.24              | -79.2              | 1034.86           | 1.675                           | 7.6           | 24.4         |
| 3                 | 8 $\alpha$ -CL-20/4CO <sub>2</sub>                | 3                       | 3         | 3.5                    | 6                     | 0        | 0                     | 0                     | 0         | 0          | 0                      | 0                                    | 0        | 460        | 0.033696 | 29.68              | -13.3              | 1235.84           | 1.987                           | 9.2           | 39.7         |
| 4                 | 4 $\beta$ -CL-20/2 $\beta$ -HMX                   | 5                       | 5         | 3                      | 8                     | 0        | 0                     | 0                     | 0         | 0          | 0                      | 0                                    | 0        | 586        | 0.035836 | 27.90              | 32.4               | 1255.15           | 1.945                           | 9.2           | 39.5         |
| 5                 | 8 $\beta$ -CL-20/8TNT                             | 5.5                     | 12.5      | 0                      | 7.5                   | 0.5      | 0                     | 0                     | 0         | 0          | 0                      | 0                                    | 0        | 665        | 0.038346 | 25.84              | 14.2               | 995.64            | 1.853                           | 8.5           | 32.9         |
| 6                 | 16 $\beta$ -CL-20/16BL                            | 6                       | 8         | 0                      | 6                     | 2        | 0                     | 0                     | 0         | 0          | 0                      | 0                                    | 0        | 524        | 0.038168 | 25.00              | -70.4              | 930.52            | 1.804                           | 8.1           | 29.5         |
| 7                 | 4 $\beta$ -CL-20/4BTf                             | 3                       | 9         | 3                      | 9                     | 0        | 0                     | 0                     | 0         | 0          | 0                      | 0                                    | 0        | 690        | 0.034783 | 28.75              | 179.4              | 1264.57           | 1.918                           | 9.1           | 38.0         |
| 8                 | 2 $\gamma$ -CL-20/7DO                             | 17                      | 2         | 0                      | 6                     | 18       | 0                     | 0                     | 0         | 0          | 0                      | 0                                    | 0        | 746        | 0.033512 | 21.20              | -310.9             | 971.18            | 1.56                            | 6.7           | 18.2         |
| 9                 | 4 $\beta$ -CL-20/12HMPA                           | 7.5                     | 0         | 0                      | 10.5                  | 24       | 22.5                  | 0                     | 0         | 0          | 1.5                    | 0                                    | 0        | 975        | 0.041538 | 11.70              | -320.4             | 1213.19           | 1.395                           | 6.3           | 15.0         |
|                   | $\beta$ -HMX                                      | 4                       | 4         | 0                      | 4                     | 0        | 0                     | 0                     | 0         | 0          | 0                      | 0                                    | 0        | 296        | 0.040541 | 24.67              | -0.7               | 1135.44           | 1.903                           | 9.1           | 38.3         |
|                   | $\alpha$ -HMX                                     | 4                       | 4         | 0                      | 4                     | 0        | 0                     | 0                     | 0         | 0          | 0                      | 0                                    | 0        | 296        | 0.040541 | 24.67              | -5.1               | 1120.68           | 1.84                            | 8.9           | 35.6         |

|    |                                   |     |     |   |     |      |     |   |   |   |   |   |   |     |          |       |        |         |       |     |      |
|----|-----------------------------------|-----|-----|---|-----|------|-----|---|---|---|---|---|---|-----|----------|-------|--------|---------|-------|-----|------|
| 10 | 4 $\alpha$ -HMX/4PDA              | 8   | 0   | 0 | 5   | 10   | 0   | 0 | 0 | 0 | 0 | 0 | 0 | 404 | 0.032178 | 21.85 | -1.0   | 1142.03 | 1.599 | 7.0 | 20.2 |
| 11 | 4 $\beta$ -HMX/4PDCA              | 9   | 1   | 0 | 5   | 9    | 0   | 0 | 0 | 0 | 0 | 0 | 0 | 428 | 0.035047 | 22.00 | -100.8 | 1041.59 | 1.579 | 7.1 | 20.6 |
| 12 | $\beta$ -HMX/2PN <sub>ox</sub>    | 10  | 0   | 0 | 5   | 16   | 1   | 0 | 0 | 0 | 0 | 0 | 0 | 514 | 0.031128 | 20.13 | 15.0   | 1153.75 | 1.533 | 6.6 | 17.4 |
| 13 | 4 $\alpha$ -HMX/4FA               | 6.5 | 1.5 | 0 | 4.5 | 8.5  | 0   | 0 | 1 | 0 | 0 | 0 | 0 | 407 | 0.03317  | 22.59 | -48.1  | 1062.65 | 1.634 | 7.2 | 21.4 |
| 14 | 2 $\beta$ -HMX/4DNDA              | 12  | 4   | 0 | 8   | 6    | 0   | 0 | 0 | 0 | 0 | 0 | 0 | 624 | 0.038462 | 23.00 | -41.7  | 1213.89 | 1.64  | 8.0 | 26.9 |
| 15 | 4 $\gamma$ -HMX/2H <sub>2</sub> O | 4.5 | 4   | 0 | 4   | 0    | 0   | 0 | 0 | 0 | 0 | 0 | 0 | 305 | 0.040984 | 24.40 | -58.8  | 1006.13 | 1.78  | 8.5 | 31.7 |
| 16 | 4 $\alpha$ -HMX/4T <sub>2</sub>   | 6   | 2   | 0 | 4   | 8    | 0   | 0 | 0 | 0 | 0 | 0 | 2 | 436 | 0.027523 | 23.00 | 31.7   | 989.31  | 1.709 | 6.6 | 18.9 |
| 17 | 6 $\alpha$ -HMX /6Py              | 7.5 | 1.5 | 0 | 4.5 | 6.5  | 0   | 0 | 0 | 0 | 0 | 0 | 0 | 381 | 0.035433 | 22.44 | -73.4  | 1048.98 | 1.603 | 7.3 | 21.8 |
| 18 | 4 $\alpha$ -HMX/4DAT              | 8   | 0   | 0 | 5   | 11   | 1   | 0 | 0 | 0 | 0 | 0 | 0 | 418 | 0.033493 | 20.43 | -18.0  | 1063.16 | 1.604 | 6.9 | 19.8 |
|    | TNT                               | 2.5 | 3.5 | 0 | 1.5 | 3.5  | 0   | 0 | 0 | 0 | 0 | 0 | 0 | 227 | 0.03304  | 24.67 | -18.7  | 961.37  | 1.654 | 7.2 | 21.7 |
| 19 | 2TNT/2 1-BN                       | 5.5 | 0.5 | 0 | 1.5 | 16.5 | 0   | 0 | 0 | 1 | 0 | 0 | 0 | 434 | 0.019585 | 27.76 | 4.3    | 792.91  | 1.661 | 5.4 | 12.5 |
| 20 | 2TNT/2Nap                         | 6   | 0   | 0 | 1.5 | 17   | 0.5 | 0 | 0 | 0 | 0 | 0 | 0 | 355 | 0.022535 | 18.88 | 4.2    | 988.63  | 1.43  | 5.1 | 9.8  |
| 21 | 2TNT/2 9-BN                       | 6   | 0   | 0 | 1.5 | 21   | 0.5 | 0 | 0 | 1 | 0 | 0 | 0 | 484 | 0.018595 | 25.78 | 23.0   | 782.05  | 1.614 | 5.1 | 10.7 |
| 22 | 4TNT/4Ant                         | 6   | 0   | 0 | 1.5 | 21   | 0   | 0 | 0 | 0 | 0 | 0 | 0 | 405 | 0.018519 | 20.00 | 21.3   | 908.99  | 1.449 | 4.6 | 8.2  |
| 23 | 4TNT/4Per                         | 6   | 0   | 0 | 1.5 | 27   | 2.5 | 0 | 0 | 0 | 0 | 0 | 0 | 479 | 0.020877 | 15.50 | 32.8   | 792.40  | 1.464 | 4.5 | 7.7  |
| 24 | 2TNT/2TT                          | 4.5 | 1.5 | 0 | 1.5 | 11.5 | 0   | 0 | 0 | 0 | 0 | 0 | 4 | 431 | 0.017401 | 22.00 | 27.1   | 758.21  | 1.632 | 4.7 | 9.3  |
| 25 | 8TNT/8DBZ                         | 6   | 0   | 0 | 1.5 | 19   | 0.5 | 0 | 0 | 0 | 0 | 0 | 1 | 411 | 0.019465 | 18.88 | 13.4   | 876.45  | 1.477 | 4.7 | 8.5  |
| 26 | 4TNT/4 $\alpha$ -ABA              | 6   | 2   | 0 | 2   | 12   | 0   | 0 | 0 | 0 | 0 | 0 | 0 | 364 | 0.027473 | 22.00 | -113.0 | 787.36  | 1.506 | 5.7 | 12.8 |
| 27 | 4TNT/8 $\alpha$ -ABA              | 9.5 | 0.5 | 0 | 2.5 | 20.5 | 0   | 0 | 0 | 0 | 0 | 0 | 0 | 501 | 0.02495  | 20.40 | -138.6 | 845.71  | 1.444 | 5.3 | 10.6 |
| 28 | 2TNT/2AA                          | 6   | 2   | 0 | 2   | 12   | 0   | 0 | 0 | 0 | 0 | 0 | 0 | 364 | 0.027473 | 22.00 | -119.4 | 769.78  | 1.524 | 5.7 | 12.9 |
| 29 | 4TNT/8AA                          | 9.5 | 0.5 | 0 | 2.5 | 20.5 | 0   | 0 | 0 | 0 | 0 | 0 | 0 | 501 | 0.02495  | 20.40 | -145.3 | 832.34  | 1.476 | 5.3 | 11.0 |
| 30 | 4TNT/4DMB                         | 7.5 | 0.5 | 0 | 1.5 | 14.5 | 0   | 0 | 0 | 0 | 0 | 0 | 0 | 365 | 0.026027 | 20.11 | -89.3  | 979.26  | 1.435 | 5.5 | 11.7 |
| 31 | 2TNT/2DMDBT                       | 6   | 0   | 0 | 1.5 | 21   | 2.5 | 0 | 0 | 0 | 0 | 0 | 1 | 439 | 0.022779 | 15.50 | -7.0   | 774.13  | 1.43  | 4.6 | 7.9  |
| 32 | 4TNT/4PA                          | 6   | 0   | 0 | 2   | 19   | 1   | 0 | 0 | 0 | 0 | 0 | 1 | 426 | 0.021127 | 18.44 | 1.8    | 818.34  | 1.496 | 4.8 | 9.1  |
| 33 | 2TNT/2T <sub>2</sub>              | 4.5 | 1.5 | 0 | 1.5 | 11.5 | 0   | 0 | 0 | 0 | 0 | 0 | 2 | 367 | 0.020436 | 22.00 | 19.6   | 870.00  | 1.604 | 5.2 | 11.3 |

|    |             |     |      |   |     |     |     |   |   |   |   |   |   |   |     |          |       |       |         |       |     |      |
|----|-------------|-----|------|---|-----|-----|-----|---|---|---|---|---|---|---|-----|----------|-------|-------|---------|-------|-----|------|
| 34 | 4TNT/4PDA   | 6   | 0    | 0 | 2.5 | 13  | 0.5 | 0 | 0 | 0 | 0 | 0 | 0 | 0 | 348 | 0.025862 | 19.89 | -25.4 | 923.59  | 1.509 | 5.6 | 12.4 |
| 35 | 4TNT/4Phe   | 6   | 0    | 0 | 1.5 | 21  | 1.5 | 0 | 0 | 0 | 0 | 0 | 0 | 0 | 405 | 0.022222 | 17.00 | 15.0  | 893.38  | 1.422 | 4.8 | 8.6  |
| 36 | 4TNT/4TNB   | 4   | 8    | 0 | 3   | 5   | 0   | 0 | 0 | 0 | 0 | 0 | 0 | 0 | 440 | 0.034091 | 25.33 | -28.6 | 940.36  | 1.64  | 7.3 | 22.0 |
|    | BTF         | 0   | 6    | 0 | 3   | 0   | 0   | 0 | 0 | 0 | 0 | 0 | 0 | 0 | 252 | 0.035714 | 28.00 | 134.4 | 1161.90 | 1.901 | 8.9 | 36.3 |
| 37 | 4BTF/4TNA   | 2   | 10   | 0 | 5   | 2   | 0   | 0 | 0 | 0 | 0 | 0 | 0 | 0 | 482 | 0.03527  | 26.82 | 112.2 | 1020.33 | 1.834 | 8.3 | 30.6 |
| 38 | 4BTF/4MATNB | 3   | 9    | 0 | 5   | 4   | 0   | 0 | 0 | 0 | 0 | 0 | 0 | 0 | 494 | 0.034413 | 26.24 | 118.6 | 1072.06 | 1.751 | 7.9 | 27.6 |
| 39 | 2BTF/2TNAZ  | 2   | 8    | 1 | 5   | 0   | 0   | 0 | 0 | 0 | 0 | 0 | 0 | 0 | 444 | 0.036036 | 27.75 | 140.9 | 1265.20 | 1.844 | 8.9 | 35.8 |
| 40 | 4BTF/4TNB   | 1.5 | 10.5 | 0 | 4.5 | 1.5 | 0   | 0 | 0 | 0 | 0 | 0 | 0 | 0 | 465 | 0.035484 | 27.09 | 128.1 | 1058.06 | 1.806 | 8.3 | 30.5 |
| 41 | 4BTF/4TNT   | 2.5 | 9.5  | 0 | 4.5 | 3.5 | 0   | 0 | 0 | 0 | 0 | 0 | 0 | 0 | 479 | 0.034447 | 26.48 | 122.5 | 1081.00 | 1.747 | 8.0 | 27.7 |
